# Supplementary material for: RulNet: A Web-Oriented Platform for Regulatory Network Inference, Application to Wheat –Omics Data
Source: PLOS journal article supplement (doi:10.1371/journal.pone.0127127), 2015-05-19
Supplement: S12 (10.1371/journal.pone.0127127.s012) [file journal.pone.0127127.s012]

## S1 File

### Grammar specifications of the RQL language

The grammar specifications of the language to define different semantics can be defined using Backus-Naur Form (BNF) standards (Backus *et al.*, 1960) (Box S1). A BNF consists of a set of derivation rules of the form  $\langle symbol \rangle ::= \_expression\_$ , where  $\_expression\_$  consists of one or more sequences of symbols, separated by a vertical bar (|) indicating a choice. A symbol is terminal if it does not appear on the left hand side of any derivation rule. The non-terminal symbol  $\langle query \rangle$  shows the global form of a query, from which we can see the SQL inspiration.

#### Box S1. Backus-Naur Form grammar of the extended form of the RQL language

```
 $\langle query \rangle ::=$   
  "FINDRULES "  
  "SCOPE "  $\langle psi \rangle$   
  "HAVING "  $\langle pred\_list \rangle$  ";"  
 $\langle psi \rangle ::=$   
   $\langle tupvar\_list \rangle$  " [WHERE "  $\langle SQL\_condition \rangle$  ]  
 $\langle tupvar\_list \rangle ::=$   
   $\langle tupvar\_def \rangle$  |  $\langle tupvar\_def \rangle$  " , "  $\langle tupvar\_list \rangle$   
 $\langle tupvar\_def \rangle ::=$   
   $\langle tupvar \rangle$  " IN "  $\langle data \rangle$   
 $\langle data \rangle ::=$   
   $\langle table\_name \rangle$  | "("  $\langle SQL\_query \rangle$  ")"  
 $\langle pred\_list \rangle ::=$   
   $\langle predicate \rangle$  |  $\langle predicate \rangle$  " AND "  $\langle pred\_list \rangle$   
 $\langle predicate \rangle ::=$  [ $\langle label \rangle$  " : " ]  $\langle delta \rangle$  " OVER "  $\langle att\_list \rangle$  | ALL | ALL MINUS  $\langle att\_list \rangle$  ";"  
 $\langle delta \rangle ::=$   $\langle delta\_atomic \rangle$  |  
  "("  $\langle delta \rangle$  ")" |  
  " NOT "  $\langle delta \rangle$  |  
   $\langle delta \rangle$   $\langle logical\_connector \rangle$   $\langle delta \rangle$   
 $\langle delta\_atomic \rangle ::=$   
   $\langle tupvar \rangle$  ".ATT "  $\langle comparison\_op \rangle$   $\langle tupvar \rangle$  ".ATT" |  
   $\langle tupvar \rangle$  ".ATT "  $\langle comparison\_op \rangle$   $\langle constant \rangle$   
 $\langle logical\_connector \rangle ::=$  " OR " | " AND "  
 $\langle comparison\_op \rangle ::=$  "=" | "<" | ">" | "<=" | ">=" | "!="
```

$\langle SQL\_query \rangle$  represents a classical (SELECT FROM WHERE) query and  $\langle SQL\_condition \rangle$  is the clause used for instance in the "WHERE" statement of a SQL query. RQL also provides most of the functions provided by SQL, such as SQRT, ABS, ROWID, SUBSTR or LTRIM.

The "OVER" clause specifies the attributes on which the predicates have to be discovered. These attributes have to be present in the datasets otherwise the query cannot be semantically correct.

A predicate is defined as a label (<label>), a property (<delta>) and an attribute list (<att\_list>) on which the predicate is tested. The clause <label> is optional but it is necessary if multiple predicates are defined for an attribute. The keyword "ATT" will then be replaced by each attribute of the <att\_list> clause and tested to check if the rule is satisfied.
