# Supplementary material for: RulNet: A Web-Oriented Platform for Regulatory Network Inference, Application to Wheat –Omics Data
Source: PLOS journal article supplement (doi:10.1371/journal.pone.0127127), 2015-05-19
Supplement: S13 (10.1371/journal.pone.0127127.s013) [file journal.pone.0127127.s013]

## S2 File

### Semantics used to infer regulatory networks from wheat –omics data

QNS1: Discover rules between highly abundant molecules and N/S supply or development phase.

---

#### FINDRULES

SCOPE *t1* IN Omic\_data

HAVING high : *t1*.ATT > 0.5 OVER ALL MINUS sample, Nitrogen, Sulfur, Phase\_1, Phase\_2, Phase\_3

AND NoNitrogen : *t1*.ATT = 0 OVER Nitrogen

AND Nitrogen : *t1*.ATT = 15 OVER Nitrogen

AND NoSulfur : *t1*.ATT = 0.2 OVER Sulfur

AND Sulfur: *t1*.ATT = 2 OVER Sulfur

AND Cellularization : *t1*.ATT = 1 OVER Phase\_1

AND Storage : *t1*.ATT = 1 OVER Phase\_2

AND Senescence : *t1*.ATT = 1 OVER Phase\_3;

---

QNS2: Discover rules between not abundant molecules and N/S supply or development phase.

---

#### FINDRULES

SCOPE *t1* IN Omic\_data

HAVING high : *t1*.ATT < -0.5 OVER ALL MINUS sample, Nitrogen, Sulfur, Phase\_1, Phase\_2, Phase\_3

AND NoNitrogen : *t1*.ATT = 0 OVER Nitrogen

AND Nitrogen : *t1*.ATT=15 OVER Nitrogen

AND NoSulfur : *t1*.ATT = 0.2 OVER Sulfur

AND Sulfur: *t1*.ATT = 2 OVER Sulfur

AND Cellularization : *t1*.ATT = 1 OVER Phase\_1

AND Storage : *t1*.ATT = 1 OVER Phase\_2

AND Senescence : *t1*.ATT = 1 OVER Phase\_3;

---
